# Supplementary material for: A novel approach to the clustering of microarray data via nonparametric density estimation
Source: Springer Nature journal article supplement (doi:10.1186/1471-2105-12-49), 2011-02-08

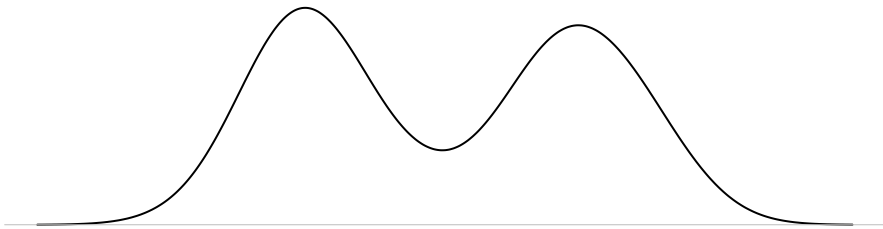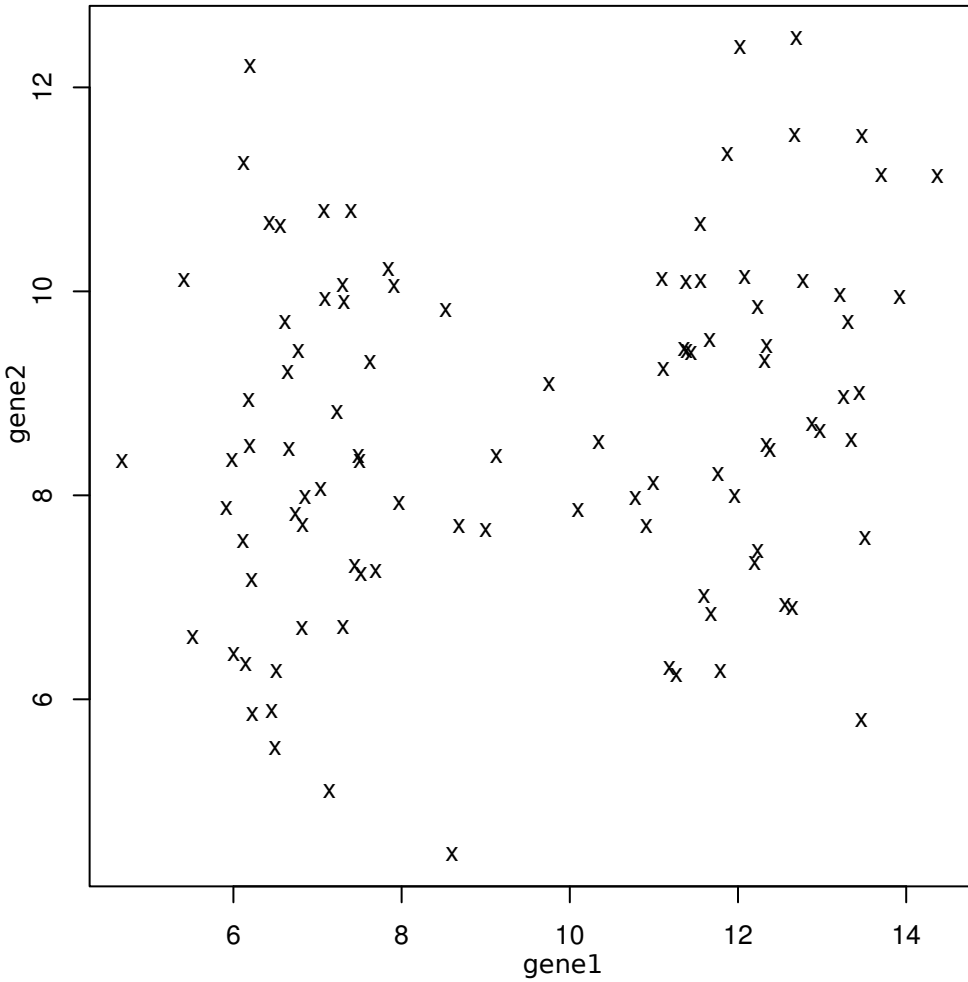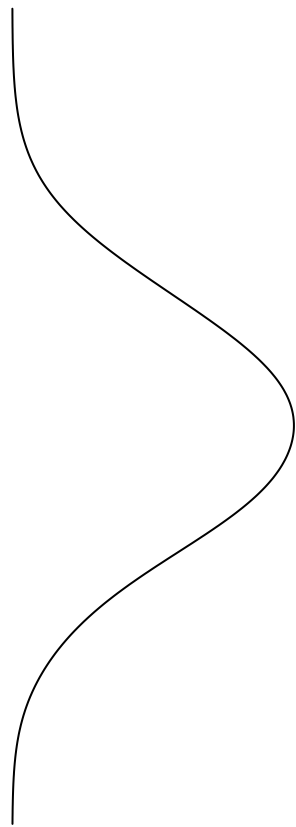

Supplement: 12859_2010_4358_MOESM1_ESM.pdf [file 12859_2010_4358_MOESM1_ESM.pdf]
